1 **Transgender fathering: children’s psychological and family outcomes**

2

3

4

5 Agnès Condat<sup>1,2</sup>, Grégor Mamou<sup>3</sup>, Chrystelle Lagrange<sup>1</sup>, Nicolas Mendes<sup>1,4</sup>, Joy Wielart<sup>1</sup>,  
6 Fanny Poirier<sup>1</sup>, François Medjkane<sup>5</sup>, Julie Brunelle<sup>1</sup>, Véronique Drouineaud<sup>4</sup>, Ouriel  
7 Rosenblum<sup>1,4</sup>, Nouria Gründler<sup>1,4</sup>, François Ansermet<sup>6</sup>, Jean-Philippe Wolf<sup>4,7</sup>, Bruno  
8 Falissard<sup>8</sup>, David Cohen<sup>1,9</sup>

9

- 10 1. Service de Psychiatrie de l’Enfant et de l’Adolescent, Hôpital Pitié-Salpêtrière, AP-HP, Paris, France;  
11 2. CESP INSERM 1018, ED3C, université Paris Descartes, Paris, France;  
12 3. Clinique Dupré, Fondation Santé des Etudiants de France, Sceaux, France;  
13 4. Service Biologie de la Reproduction – CECOS, Hôpital Cochin, AP-HP, Paris, France;  
14 5. Service de Psychiatrie de l’Enfant et de l’Adolescent, CHU de Lille, Lille, France;  
15 6. Service de Psychiatrie de l’enfant et de l’adolescent, Département de l’enfant et de l’adolescent, Hôpitaux  
16 universitaires de Genève;  
17 7. Université Paris Descartes, Paris, France ;  
18 8. Inserm, U669, Paris, France;  
19 9. Institut des Systèmes Intelligents et de Robotiques, Université Pierre et Marie Curie, Paris, France.

20

21 *Corresponding author: Agnès Condat, [agnes.condat@aphp.fr](mailto:agnes.condat@aphp.fr), ORCID/0000-0003-2394-6993*

22

23

24 **Authors' contributions:** AC, BF, DC, JPW, and VD designed the study protocol; CL, NM, AC, JW, FP and  
25 JB performed the clinical assessments; BF, DC and JW designed the experimental procedure based on family  
26 drawings; FM, NG, FA, and OR ran the experimental procedure; AC, DC, GM and BF performed all statistical  
27 analyses; and AC, DC and GM wrote the first version of the MS; All authors contributed to the final version of  
28 the manuscript.

29

30

31 **Abstract**

32 Medical advances in assisted reproductive technology have created new ways for transgender persons to become  
33 parents outside the context of adoption. The paucity of empirical data does not support the idea that trans-  
34 parenthood negatively impacts children’s development. However, the question has led to lively societal debates  
35 making the need for evidence-based studies urgent.

36 We aimed to compare cognitive development, mental health, gender identity, quality of life and family dynamics  
37 using standardized instruments and experimental protocols in 32 children who were conceived by donor sperm  
38 insemination (DSI) in couples with a cisgender woman and a transgender man, the transition occurring before  
39 conception. We constituted two control groups matched for age, gender and family status.

40 We found no significant difference between groups regarding cognitive development, mental health, and gender  
41 identity, meaning that neither the trans factor nor the use of DSI had any impact on these characteristics. The

42 results of the descriptive analysis showed positive psycho-emotional development. Additionally, when we asked  
43 raters to differentiate the family drawings of the group of children of trans-fathers from those who were naturally  
44 conceived, no rater was able to differentiate the groups above chance levels, meaning that what children  
45 expressed through family drawing did not indicate cues related to trans-fatherhood. However, when we assessed  
46 mothers and fathers with the Five-Minute Speech Sample, we found that the emotions expressed by transgender  
47 fathers were higher than those of cisgender fathers who conceived by sex or by DSI.  
48 We conclude that the first empirical data regarding child development in the context of trans-parenthood are  
49 reassuring. We believe that this research will also improve transgender couple care and that of their children in a  
50 society where access to care remains difficult in this population. However, further research is needed with  
51 adolescents and young adults.

## 52 **Keywords**

53 Transgender; Fathering; Parenting; Assisted Reproductive Technology; Children's Development

54

55

56

## 57 **Declarations**

58 **Funding:** The project has received funding from the Pfizer Foundation and the *Centre d'Activités et de*  
59 *Recherche en Psychiatrie Infanto-Juvenile (CARPIJ).*

60

61 **Conflicts of interest/competing interest(s):** AC received funding from the Pfizer Foundation. The sponsor  
62 did not intervene in the study design and did not participate in recruitment, analysis of the data or writing of the  
63 manuscript. Other authors have no potential conflicts of interest to declare.

64

65 **Ethics approval:** CERES (*Comité d'Ethique de Recherche en Santé*) of Paris 5 University (Registration  
66 number: 2015/31).

67 **Consent to participate:** Informed written consent was obtained from parents and children for participation in  
68 the study, orally up to 11 years old and with a written document for parents and for children and adolescents aged  
69 12 to 15 years old. Appropriate information was provided to parents and the child or adolescent according to  
70 their age. When parents did not give their child born by DSI information about how he/she was conceived, we  
71 respected their wish and did not reveal it. It was an important ethical concern that was addressed with the ethics  
72 committee. We ensured that the study was presented as a research on the psycho-emotional development of  
73 children according to their mode of conception where parents could tell their child they belong to the control  
74 group of children conceived "naturally" if it was their choice to do so. Children and adolescents were therefore  
75 informed of the general objectives of the study in which they would participate but not of their status among the  
76 three possible groups. The information was given to them as follows: "*Children are most often conceived by*  
77 *their parents, but parents may not be able to have children without the help of doctors. This research tries to find*  
78 *out if the way a child has been conceived can have effects on his psychological and emotional development.*"

79

80 **Consent for publication:** Consent for publication was included in the Informed written consent and was  
81 obtained from parents and children.

82

83 **Availability of data and material:** The whole data and material are available from the corresponding  
84 author.

85

86 **Code availability:** As requested by French regulation, all data were processed anonymously and  
87 confidentially. Data were identified only by a code number and correspondence between this code and the  
88 participant's name/surname could only be established through a private list kept separately in another office. We  
89 used the Pitié-Salpêtrière child psychiatry computerized database for the processing of these data (CNIL  
90 declaration n° 1303778). The data of the present study were analysed using the statistical programme R, version  
91 3.3.1 (R Foundation for Statistical Computing) [32].

92

93

94

## 95 **Introduction**

96 For years, individuals and couples with fertility issues have been able to conceive thanks to biomedical  
97 technology advances [1]. These medical advances in assisted reproductive technology (ART) have created new  
98 ways for transgender persons to become parents outside the context of adoption [2]. Becoming a parent is a  
99 major life experience for human beings, and many trans people want to become parents [2]. However,  
100 hormone/surgical treatments that can benefit transgender people are potentially sterilizing. Currently, it remains  
101 technically impossible to develop the capacity to procreate after surgical transformation, but it is possible to help  
102 trans people use their own gametes with assisted reproductive technology (ART). Trans parenthood is therefore  
103 possible through adoption but also through other paths, including using trans person's own gametes. Therefore,  
104 the World Professional Association for Transgender Health (WPATH) recommends discussing fertility options  
105 with patients before any treatment or medical and/or surgical interventions [3].  
106 Heterosexual couples in which the male partner is a transgender man can turn to ART through artificial  
107 insemination with donor sperm insemination (DSI). Transgender women who have a male partner may ask for  
108 the help of a surrogate mother in countries where this is allowed and if this surrogate is not also a donor of her  
109 own oocytes for egg donation. In the first case, if the transgender man has self-conserved his oocytes/ovarian  
110 tissue before the transition, the couple may consider crossover in vitro fertilization (IVF). In the second case, the  
111 preserved sperm of the transgender woman can similarly be used to fertilize donated oocytes for all or part of the  
112 offspring. Other combinations are possible in the case of gay couples [4]. However, these options are not  
113 available in many countries, as they are framed by laws and bioethics regulations, which can vary from one  
114 country to another.

115 In France, for example, the law prohibits surrogacy, and ART was granted to heterosexual couples only  
116 until the House of Representatives changed the law in October 2019. The Senate still has to approve the new  
117 law, and ART will soon be open to couples of women and to single women, but this recent revision does not take  
118 into account the situation of transgender persons. Currently, the only option available to trans people in France is  
119 DSI for heterosexual couples in which one of the partners is a transgender man. The number of transgender  
120 people and transparent families has been estimated in France from the number of transitional surgeries counted  
121 by the national health insurance fund, leading to a very low and unreliable prevalence between 1/10,000 and  
122 1/50,000 [5]. However, the desire of transgender people to become parents is substantially high in France: 10%  
123 for transgender men and 4% for transgender women, in addition to the 20% of transgender people who want to  
124 adopt a child [6]. It should be noted, however, that in this study, 8% of transgender men and 45% of transgender  
125 women were already parents before their gender transition [7].

126 Biotechnological advances have also introduced new changes in the ancestral logic of conceiving that  
127 refer to two equal lineages (that of the mother and that of the father) and the traditional transition steps from  
128 conception to adult sexuality with several cultural/symbolic invariants, including (1) the temporal order, (2) the  
129 certainty of one's mother, and (3) the parallel link between sex and gender [4,8]. The traditional boundaries  
130 among gender identity, sexuality, conception, gestation, procreation, and filiation are deeply challenged. If the  
131 spread of contraception over the last fifty years has caused an effective separation between sexuality and  
132 procreation, the current disruptions in conservative thinking are going much further [4]. These advances are  
133 confusing to many and sometimes may create discomfort and apprehension. They have led to lively societal

134 debates opposing 2 different views: bio-catastrophists, on the one hand, and techno-prophets, on the other hand  
135 [9]. The former think that science serves as a driving force bringing about apocalyptic times. It contributes to the  
136 destruction of norms and traditional modes and understandings of the meaning of life, with severe consequences  
137 for society and, ultimately, the resulting end of the human species. In contrast, the latter believe that science  
138 offers the promise of a paradisiac future, a new redemptive era with a pure incorporeal spirit emerging from  
139 thinking machines.

140 These new ways to conceive a child crystallize several ethical questions discussed by the ESHRE Task  
141 Force that proposed guidelines [10]. Finally, the ultimate challenge seems to be the well-being of the child to  
142 come. Some may question the welfare of the offspring because some may think such trans-parenthood may be  
143 confusing for children [4].

144 The literature on the psychological well-being of transgender parents' children is sparse and limited to 4  
145 studies that included 146 children [11-14]. Overall, they do not support the idea that trans-parenthood negatively  
146 impacts children's development. However, assessments were not blind, and children were born before their  
147 parent's transition. None of the children developed any gender identity variants, but some experienced  
148 difficulties in their relationship with peers (e.g., 33% in [13]); some suffered from depression (e.g., 13% in [14]).  
149 Notably, no study included a non-clinical control group and used an experimental design.

150 The best situation to study the eventual impact of transgender parenthood is to explore children who are  
151 conceived by transgender people after their transition. In that case, children do not have to adapt to a new  
152 parental identity and are less confronted with socially aversive reactions [10]. Fifty-two children born between  
153 2000 and 2015, by donor sperm insemination (DSI) in couples with a transgender man (assigned female at birth)  
154 and a cisgender woman, were followed qualitatively every two years. Children developed well without any  
155 major psychological morbidity [15]. Most of the child participants knew that they were born by third-party ART  
156 and that their fathers were assigned females at birth.

157 In the continuity of this last qualitative study, we proposed to carry out a two-year cross-sectional  
158 comparative study using standardized quantitative instruments. We aimed to compare cognitive development,  
159 mental health, gender identity, quality of life and family dynamics in children from transgender fathers  
160 conceived by donor sperm insemination (Trans-DSI group) and in two control groups matched for age, gender  
161 and family status (in couple vs separated): **naturally conceived** (NC group) children conceived by sex from  
162 cisgender parents and children from cisgender parents conceived by conventional DSI (Cis-DSI group). We  
163 chose to recruit such two control groups to differentiate the impact of the trans factor from the possible impact of  
164 the use of ART in the condition of third-party procreation. In addition, there is also very few data on the overall  
165 development of children conceived with sperm donation and the current study is the first one in France.

166 A common intuitive idea in the general population and sometimes argued by many childhood  
167 professionals in France is that parents' perceptions and emotional experiences of their child vary according to  
168 their biological sex and their assignation sex during their own development. Many argue that having a  
169 transgender parent could have consequences in terms of parent-child relationship and family dynamics [16]. To  
170 address this issue, we used the Five-Minute Speech Sample (FMSS) [17,18], which is an instrument assessing  
171 the emotional climate within the family through attitudes and feelings expressed by a parent towards his/her  
172 child and termed expressed emotions. In addition, we developed a quasi-experimental design based on children's  
173 family drawings to investigate whether cues not captured by the questionnaire could be seen by blind raters [17].

174 We hypothesized that (i) the psycho-affective development of children born by DSI whose father is a  
175 transgender man will not significantly differ from that of children born by conventional DSI or from that of  
176 children conceived by sexual intercourse of both cisgender parents (NC group); (ii) father and mother reports  
177 regarding their child will not differ; (iii) family dynamics in the families of children from Trans-DSI group will  
178 not significantly differ from that of families of children from Cis- DSI or from NC groups; using either a  
179 measure of parental expressed emotion towards the child; (iv) or through family drawing (meaning that no group  
180 of raters will be able to differentiate the family drawings between children from transgender fathers conceived by  
181 DSI and NC children).

182

## 183 **Methods and analysis**

### 184 *Design*

185 The study design is a monocentric cross-sectional comparative study over two years. The recruitment  
186 centre, CECOS-Cochin, is unique, but this centre is authorized to treat couples from all over France. When the  
187 first DSI for couples whose father was a transgender occurred in 2000, CECOS-Cochin was the only centre  
188 authorized in France. The study includes two domains: (i) a clinical assessment to assess psycho-affective  
189 development and (ii) a family exploration using parental expressed emotion towards the child and an  
190 experimental procedure (see below).

### 191 *Ethics*

192 The protocol was approved by the CERES (*Comité d’Ethique de Recherche en Santé*) of Paris 5  
193 University (Registration number: 2015/31). Informed written consent was obtained from parents and children for  
194 participation in the study, orally up to 11 years old and with a written document for parents and for children and  
195 adolescents aged 12 to 15 years old. Appropriate information was provided to parents and the child or adolescent  
196 according to their age. When parents did not give their child born by DSI information about how he/she was  
197 conceived, we respected their wish and did not reveal it. It was an important ethical concern that was addressed  
198 with the ethics committee. We ensured that the study was presented as a research on the psycho-emotional  
199 development of children according to their mode of conception where parents could tell their child they belong  
200 to the control group of children conceived "naturally" if it was their choice to do so. Children and adolescents  
201 were therefore informed of the general objectives of the study in which they would participate but not of their  
202 status among the three possible groups. The information was given to them as follows: "*Children are most often  
203 conceived by their parents, but parents may not be able to have children without the help of doctors. This  
204 research tries to find out if the way a child has been conceived can have effects on his psychological and  
205 emotional development.*"

206

### 207 *Recruitment of the participants*

208 We constituted the first group (Trans-DSI group) composed of children of transgender fathers and  
209 cisgender mothers conceived by DSI based on the national cohort available [15]. Gender identity of the persons  
210 was established according to their statement during the interview conducted by the biologist and psychologists at  
211 CECOS-Cochin prior to conception by ART and was confirmed during our study’s interview. All the mothers

212 identified themselves as cisgender women and all the fathers as transgender men. All said themselves to be  
213 binary identified. We proposed the research to 30 families over the 37 families of the national cohort (53  
214 children). Seven of the 37 families had children too young to participate in the study (less than 18 months, which  
215 is the threshold age for the instrument which assesses global psychopathology). Seventeen out of the 30 families  
216 (i.e. 57%) agreed to participate. Four families refused to participate saying they did not want to spend a day for  
217 research, and nine families could not be contacted due to invalid coordinates. In total, 32 children were included  
218 in our Trans-DSI group. One parent could provide ratings on several children (see description of the sample  
219 below). This number of children should theoretically make it possible to highlight a difference between a normal  
220 and pathological range on each of the subscales of the Child Behaviour Checklist, including the internalizing and  
221 the externalizing scores (see power calculation below).

222 Then, we recruited 2 control groups of the same size matched for age, sex and family status. These two  
223 control groups constitute convenience samples recruited according to the characteristics of the group of children  
224 born by DSI of transgender father. In the second group, children were born by conventional DSI of both  
225 cisgender parents (Cis-DSI group). Approximately 75 couples have a progressive pregnancy by DSI at CECOS-  
226 Cochin each year. It is common for these couples to come back with a second or third request for donor-  
227 insemination. During the years 2014 and 2015, it was proposed to couples consulting in this context and to all  
228 other couples with at least one child born by DSI who consulted the CECOS of Cochin for whatever reasons to  
229 participate in the research. We also contacted other couples who had given their written consent to be contacted  
230 again by the CECOS for a research programme at the time they received the DSI. We included 28 children in our  
231 Cis-DSI group. The third group included *naturally conceived* controls born by sexual intercourse of cisgender  
232 parents (NC group). They were recruited by announcement in the meetings of the departments concerned among  
233 the families of the professionals who agreed as well as in a public school in the neighbourhood.

234 The inclusion criteria encompassed a target population of girls and boys aged under 15 years who were  
235 born by DSI or conceived by sex for the NC group and who agreed to participate in a one-day evaluation with  
236 the consent of their parents. The exclusion criteria were (i) a poor understanding of written and/or spoken French  
237 that would not have allowed participants to correctly complete the questionnaires or pass the standardized  
238 interviews and (ii) a refusal from at least one parent to sign the consent form. All couples were heterosexual, as  
239 DSI is only available for heterosexual couples in France.

240

### 241 *Sample*

242 Table 1 summarizes the sociodemographic and developmental characteristics of the participants. In  
243 total, we included 32 individuals in the Trans-DSI group, 28 individuals in the Cis-DSI group and 28 individuals  
244 in the NC group. The Trans-DSI group included 17 families: 7 had only one child included in the study, 6 had  
245 two children, 3 had 3 children and one family had 4 children. The Cis-DSI group included 16 families of which 7  
246 had only one child included in the study, 6 had two children and 3 families had 3 children. The NC group  
247 included 17 families, 7 of which had only one child included in the study, 9 had two children, and 1 family had 3  
248 children. There was a large majority of boys (75%) in our study group due to the unexplained distribution in the  
249 Trans-DSI group.

250 In the Trans-DSI group, 29 out of 32 children (from 14 out of 17 families) knew that they had been  
251 conceived by DSI and 28 (from 15 out of 17 families) knew that their father had been assigned female at birth. In

252 total, only 3 transgender parents did not inform their children of their trans identity including 2 who did not  
253 inform the child about DSI. In the Cis-DSI group 25 out of 28 children (from 13 out of 16 families) knew that  
254 they had been conceived by DSI.

255 Although we tried to match all groups on parental status, age and gender, we did not succeed for age as  
256 children in the Cis-DSI group were significantly younger (t student:  $p < 0.001$  for Trans-DSI (mean age= 6.25) vs.  
257 Cis-DSI (mean age= 4.32);  $p = 0.019$  for NC (mean age=7.63) vs. Cis-DSI). However, there was no age difference  
258 between the Trans-DSI and NC groups. The younger age of the children in the Cis-DSI group was due to French  
259 DSI specificities. In contrast to many other European countries (e.g., Switzerland), sperm donation is anonymous  
260 and not telling children about DSI and sperm donation is a very common practice. It is only in more recent years  
261 that changes in practice have been noticed in parallel with ethical debates regarding the possibility for children to  
262 ask for genetic origin (meaning changing the status of anonymous donation) [19]. Consequently, we had  
263 difficulties finding parents who conceived with DSI and older children or adolescents accepting participation in  
264 the research. Additionally, socioeconomic status (SES) and family stability were higher in the NC group.  
265 However, it is notable that very few families (N=2) across groups had low SES and that a small proportion of  
266 parents across groups (N=7, 8%) were separated.

267

## 268 *Measures*

269 Each child and family underwent a thorough single-day evaluation within the Department of Child and  
270 Adolescent Psychiatry at the Pitié-Salpêtrière Hospital in Paris or at home if parents wished to do so. The  
271 department is well suited for a one-day welcoming of children for these assessments. The evaluation day began  
272 with a family interview with a mental health professional using a semi-structured interview. The study explored  
273 several dimensions [17]. In order to test our first two hypotheses, we used respectively: (1) for cognitive  
274 development, an adapted rating according to age: for those 2 to 30 months of age, we used the Brunet-Lézine  
275 psychomotor development scale [20], which estimates a Developmental Quotient (DQ) based on the normative  
276 data available for 2-year-old French toddlers; for those 30 months to 6 years of age, the Wechsler Preschool and  
277 Primary Intelligence Scale for Children- third edition (WPPSI-3) [21], which is a standardized developmental  
278 test for preschool-age children that measures intelligence skills; and for those 7 years of age and older, we used  
279 the Wechsler Intelligence Scale for Children-fourth edition (WISC-4) [22], which is a standardized  
280 developmental test for school-age children that measures intelligence skills. (2) For mental health, we used  
281 Achenbach's Child Behaviour Checklist (CBCL) [23], which assesses global psychopathology for children aged  
282 6 to 18 years. We used the Preschool version for children aged 1.5 to 5 years. Both versions have been validated  
283 in France. The CBCL is a parent-report measure designed to record the behaviours of children (one questionnaire  
284 filled by the mother and one questionnaire filled by the father separately). Each item describes a specific  
285 behaviour, and the parent is asked to rate its frequency on a three-point Likert scale. The CBCL gives, among  
286 others, three main scores (Internalizing, Externalizing, and Total Problems): a T-score of 64 and above is  
287 considered clinically significant, values between 60 and 63 identify a borderline clinical range, and values under  
288 60 are considered non-clinical. Only the scores that were assessed by both the 1.5-5 and the 6-18 scales were  
289 selected in our study and compared. (3) For gender identity, we used the Gender Identity Interview for Children  
290 (GIIC) [24], which assesses affective and cognitive gender confusion within the child. GIIC was the only scale  
291 that was not validated in France. To ensure the properties of the French GIIC, we performed an interrater



292 reliability study that found Cronbach alpha (total score = 0.98, factor 1 = 0.95, factor 2 = 0.97) and a ROC  
293 analysis to discriminate children with gender incongruence from those who do not (on an independent sample of  
294 25 children) that found the same threshold that the one recommended in the English version (threshold=4 for  
295 possible ranges for GIC total score within 0 and 24). (4) For quality of life, we used the Kidscreen 52 [25],  
296 which assesses the child's global quality of life. The Kidscreen 52 is an auto-questionnaire for children and  
297 young people from 8 years old and measures 10 health-related quality of life dimensions: Physical (5 items),  
298 Psychological Well-Being (6 items), Moods and Emotions (7 items), Self-Perception (5 items), Autonomy (5  
299 items), Parent Relations and Home Life (6 items), Social Support and Peers (6 items), School Environment (6  
300 items), Social Acceptance (Bullying) (3 items), and Financial Resources (3 items).

301 In order to test our third hypothesis, we used: (1) the Inventory of Parent and Peer Attachment (IPPA) [26],  
302 which is an auto-questionnaire for children and adolescents from 9 years old measuring various qualities of  
303 children's relationships with parents and peers, including trust, quality of communication, and feelings of anger  
304 and alienation. It contains three sub-questionnaires: one concerning the mother, one concerning the father and  
305 one concerning peers. (2) the Five-Minute Speech Sample (FMSS) [18], which assesses the emotional climate  
306 within the family through attitudes and feelings expressed by a relative of a family member termed expressed  
307 emotions. It measures levels of criticism and emotional over-involvement made by a relative towards the child  
308 during a recorded session with the following instruction: "*I would like to hear from you about your thoughts and*  
309 *feelings about (name of family member) in your own words and without any interruption on my part by questions*  
310 *or comments. When I ask you to start, I would like you to talk to me for 5 minutes, telling me what kind of person*  
311 *is (name of the family member) and how you get along with him/her. Once you start speaking, I prefer not to*  
312 *answer any questions before the end of the 5 minutes*". The critical dimension is based on the initial statement,  
313 the expressed relationship and the blame or the dissatisfaction supported, whereas the emotional over-  
314 involvement includes emotional displays, statements of attitude (e.g., extreme loving), self-sacrificing and  
315 overprotection or a lack objectivity, an excess of detail about the past, and more than five positive remarks  
316 regarding the child [27]. For each child we recorded separately one session with the mother and one session with  
317 the father. There is no specific age range for this instrument. A total score is also calculated. The interrater  
318 reliability for FMSS scoring was strong (kappa-critical EE=0.64, p=0.008), (kappa-emotional over-involvement  
319 EE=0.68, p=0.007), (kappa-EE total=0.88, p<0.001).

### 320 *Experimental procedure*

321 To explore more subtle differences between children born from Trans-DSI (meaning a transgender  
322 father) and NC children born from natural conception from cis-gender parents who had sexual intercourse and to  
323 test our fourth hypothesis, we used a method that was previously developed to explore how traumatic experience  
324 could be guessed without explicit information through participants' responses from an experimental task using a  
325 permutation test [28]. Here, the task we proposed to children was drawing a family. We hypothesized that  
326 children born from Trans-DSI would not be more engaged during family drawing to use atypical representations  
327 (e.g., of men/fathers and of sexual indices) to be detectable by external raters. The task was inspired by the  
328 Corman's Family Drawing Test [29], which assesses the child's perception of family relationship. Drawing is a  
329 mediation offering the possibility of working from the projective and symbolic value of their contents. Corman's  
330 Family Drawing Test examines the graphic level which considers the quality of the production (the line, its size,

331 its strength, the pace of drawing and the space of the sheet used to make it), the formal level derived from the  
332 original studies of the "drawing of the good man" (the degree of development of the child through the  
333 representation of the body of the characters' drawn, the link between the different characters, as well as the  
334 different elements drawing), and the level of contents indicating a projective value of the drawing (unusual or  
335 anxious representations, specific psychological problems of each child, valorisation/devaluation of certain  
336 characters) [29].

337 This is on the ability of Family Drawing to promote child's projection associated with what the family  
338 represents that we proposed our experimental procedure. The experimental procedure responds to an assumption  
339 commonly found in French society and among childcare professionals: having a transgender parent could  
340 influence the development of the child, his/her identity construction but also his/her representations especially  
341 with regard to the family [16]. That is why we included a group of raters who were experienced child  
342 psychoanalysts expert in the interpretation of children's drawings (see below). The previous study using the same  
343 method [28] showed that psychoanalyst evaluators were the only ones to recognize better and above chance  
344 adults who experienced a childhood trauma.

345 Raters with diverse experiences would eventually be in position to guess children's group by viewing  
346 the drawings. To explore which experiences in raters may be helpful, the family drawings were analysed by 20  
347 raters (4 child and family psychoanalysts (FAMPSY), 4 adult psychiatrists (ADUPSY), 4 biologists working in  
348 ART (BIOL), 4 endocrinologists working with transgender individuals (ENDOC) and 4 students (STUD)). They  
349 were randomly shown the drawings and asked to blindly classify them according to whether the child had a  
350 transgender father using a 4-level Likert scale: *I am certain that the drawing was done by a child from the Trans-*  
351 *DSI group, I think that the drawing was probably done by a child from the Trans-DSI group, I think that the*  
352 *drawing was probably done by a child from the NC group, and I am certain that the drawing was done by a*  
353 *child from the NC group.* Differences between children's family drawings were evaluated with a generalization  
354 of the "lady tasting tea" procedure to link qualitative and quantitative approaches in psychiatric research [30].

355

### 356 *Power calculation*

357 Given that we used 2 different methods, we had two power calculations to determine. For clinical  
358 assessment, as we hypothesized that the psycho-affective development of children born by DSI whose father is a  
359 transgender man will not significantly differ from that of children born by conventional DSI or from that of  
360 children conceived by sexual intercourse of both cisgender parents, we needed to ensure that the number of  
361 individuals included was high enough to ensure that if we had no differences between groups that the statistical  
362 power was sufficient. The minimum size of the sample was calculated to be able to show with an alpha error  
363 probability of 5% and a statistical power of 80% a significant difference between two groups on the CBCL, one  
364 of our main objectives. We used the Multicultural Supplement to the Manual for the ASEBA School-Age Forms  
365 & Profiles [31] baseline data that present mean scores and standard deviations for samples corresponding to the  
366 French population for each scale. We calculated for each scale the sample size needed to highlight a difference  
367 between the normal range and the clinical range defined for the scale with an alpha error probability of 5% and a  
368 statistical power of 80% given the reference mean scores and standard deviations for the French population. We  
369 used the statistical programme R, version 3.3.1 (R Foundation for Statistical Computing) [32] with the formula

370 n.for.2means (m1, m2, sd1, sd2, ratio, alpha, power). The minimum size was found between 3 and 24 per group  
371 according to the scale. Only the CBCL Total score required a minimum size of 38 per group.

372 For the experimental procedure exploring whether raters blind to children status could classify  
373 children's family drawings above chance levels, we used a permutation test based on a modified version of  
374 Fisher's *lady tasting tea* procedure [28,30,33]. This statistical procedure was chosen to limit type I error. The  
375 number of cases, controls and raters required to detect differences with a power greater than 80% for a  $p < .05$  was  
376 calculated by Falissard et al. [30]. For a sensitivity and specificity of correctly categorizing each subject, both  
377 equal to 80%, 23 cases, 23 controls and 4 raters are enough to detect significant differences using the procedure  
378 described below with a type I error of .05 and a power calculated at 99% [30].

379

### 380 *Data processing and statistics*

381 As requested by French regulation, all data were processed anonymously and confidentially. Data were  
382 identified only by a code number and correspondence between this code and the participant's name/surname  
383 could only be established through a private list kept separately in another office. We used the Pitié-Salpêtrière  
384 child psychiatry computerized database for the processing of these data (CNIL declaration n° 1303778). The data  
385 of the present study were analysed using the statistical programme R, version 3.3.1 (R Foundation for Statistical  
386 Computing) [32]. For each variable, statistics were summarized with numbers and percentages for qualitative  
387 variables and with means (standard deviations) or medians (quartiles) for quantitative variables.

388 The first analysis compared each variable across the three study groups: **naturally conceived** children  
389 (NC group), children conceived by conventional donor sperm insemination (Cis-DSI group) and children  
390 conceived by DSI from a transgender father (Trans-DSI group). Based on the qualitative exploratory study [15],  
391 we hypothesized no difference between the groups. For each quantitative variable, we explored data distribution  
392 and normality using visual exploration. When normality was not reached, we used the Kruskal-Wallis  
393 nonparametric test. When normality was reached, ANOVA was used for 3-group comparisons, followed by  
394 Student's t-test for 2-group comparisons. For qualitative variables, we used the chi-squared or Fisher exact test  
395 according to the number of values. No correction for multiple testing has been done since our main hypotheses  
396 were in favor of the null hypothesis.

397 The second analysis explored whether raters blind to children's status could classify children's family  
398 drawings above chance levels. This analysis was limited to 2 groups. We used a permutation test based on a  
399 modified version of Fisher's *lady tasting tea* procedure [28,30,33]. It is noticeable that since the raters know that  
400 half of the records belong to "cases" and the other half to "controls", the ratings cannot be considered as  
401 independent realizations of a random variable, such that a traditional Student t-test or Mann-Whitney test should  
402 not be used. In contrast, under the null hypothesis, cases' and controls' records are indistinguishable; all  
403 permutations of scores obtained for each record are equiprobable. Hence, a sound (one-sided) p-value can be  
404 estimated as the proportion of permutations of the n records for which the total score is higher or equal to the  
405 total score obtained in the experiment [30]. We used a two-sided p-value based on a similar principle here. Of  
406 note, because of multiple testing (5 totally separate p-values were computed empirically), the level for  
407 significance was  $p < 0.01$ .

408 Therefore, the association between judges' ratings and the actual distribution of subjects into cases and  
409 controls was tested in the following way. First, a score was computed for each group of raters: FAMPSY,

410 ADUPSY, BIOL, ENDOC and STUD. The score was obtained by summing all 4\*46 coded evaluations: +2  
411 when the raters correctly answered yes or no, +1 when they correctly answered probably yes or probably no, -1  
412 when they incorrectly answered probably yes or probably no, and -2 when they incorrectly answered yes or no.  
413 Thus, for each rater, the score could vary from +92 for all correct guesses (with a maximal certainty) to -92 for  
414 no correct guesses. For each group of raters, the score could range from +368 for all perfects to -368 for  
415 maximum failure.

416 To determine whether a group classified cases and controls better than could have been expected by  
417 chance, a permutation test was performed as described above using R software version 3.3.1 (R Foundation for  
418 Statistical Computing) [32]. The p-value was finally equal to twice the number of permutations for which the  
419 score was above the score obtained for the original data set in the experiment. Given that we used a modified  
420 version of the lady tasting tea procedure, it is not possible to provide a table showing the number of permutations  
421 for each level of performance on the dyads because first, there are 4 judges and second, possible answers are not  
422 yes or no but +2, +1, -1 and -2. Therefore, the number of possible errors ranges between 0 and 92 (2\*46).

423

## 424 **Results**

### 425 *Developmental characteristics of the participants*

426 As shown in table 1, we found no significant differences between the 3 groups regarding general  
427 intelligence, gender identity, or overall mental status as assessed with the CBCL. Only the Somatic complaints  
428 Father's T-Scores showed a significant difference between the three groups ( $p = 0.043$ ). Two-to-two  
429 comparisons showed that the Trans-DSI group T-scores were significantly higher than those of the Cis-DSI  
430 group (Wilcoxon  $p = 0.013$ ). There was no significant difference between the Trans-DSI and the NC group or  
431 between the Cis-DSI group and the NC group. However, the means of the T-scores in each of the 3 groups were  
432 neither in the pathological zone nor in the limit zone. Regarding CBCL scores on an individual level, very few  
433 had CBCL subscores reaching pathological scores. Father's CBCL Total score as Mother's CBCL Total score  
434 was in the clinical range for one child in the Cis-DSI group. Father's CBCL Total score was in the clinical range  
435 for one child in the NC group and for three children in the Trans-DSI group, but Mother's CBCL Total score was  
436 in the normal range for all these children. In addition, no child or parent reported bullying or harassment during  
437 the semi-structured interview. The trans identity of the parent was known within his family and in most cases  
438 within his in-laws (15 out of 17 families). On the other hand, neither the friendly environment nor the  
439 professional or school environment for children was informed of trans identity.

440 As the groups were quite young, especially in the Cis-DSI group, we had not enough data for the  
441 Kidscreen to perform statistical analysis. Table S1 summarizes the quality of life characteristics of the  
442 participants. Kidscreen was performed by 13 children and adolescents in the NC group, 10 in the Trans-DSI  
443 group and only 2 in the Cis-DSI group. Nevertheless, for the adolescents and older children able to complete this  
444 instrument, it appears that the preliminary data are reassuring as most indicated rather good quality of life.

445 We also wanted to investigate whether the father and mother in the different groups had a rather  
446 common view of their children's psychopathology. The CBCL can be completed by each parent separately. We  
447 were able to obtain 29 pairs (father, mother) in the Trans-DSI group, 26 pairs in the Cis-DSI group and 27 pairs

448 in the NC group. Then, we calculated the intra-class correlations between mother and father CBCL scores in  
449 each group (table 2). We found that fathers globally responded as mothers for their child in the 3 groups looking  
450 at the internalizing, externalizing and total scores. Differences were observed between fathers' and mothers'  
451 responses to certain domains (withdrawn/depressed in the Cis-DSI group and attention problems and  
452 aggressive/behaviour scales in the Trans-DSI group and in the NC group).

### 453 *Family dynamics*

454 Inventory of Parents and Peers Attachment was performed by 11 children and adolescents in the NC  
455 group, 8 in the Trans-DSI group and only 2 in the Cis-DSI group. As the groups were quite young, especially in  
456 the Cis-DSI group, we had not enough data to perform statistical analysis. Table S1 summarizes the attachment  
457 characteristics of the participants. It appears that these preliminary data indicate rather secure attachment.

458 Concerning parental expressed emotions toward the child, table 3 summarizes the FMSS for mothers  
459 and fathers of each group. In contrast to children's characteristics, all parental expressed emotions showed  
460 significant differences across groups. Two-group comparisons (tables S2, S3, S4) showed that Expressed  
461 Emotions, Criticism and Emotional Over-Involvement were significantly higher in Trans-DSI fathers than in  
462 both NC and Cis-DSI fathers. There was no significant difference between the Cis-DSI and NC groups in  
463 fathers' Expressed Emotion, Criticism and Emotional Over-Involvement. For mothers, we found that they  
464 responded differently across groups but given the distributions in percentages, which were neither homogeneous  
465 nor linear, we only conducted two-group comparisons: Expressed Emotions were higher in NC mothers than in  
466 Cis-DSI mothers, Criticism was higher in Trans-DSI mothers than in NC mothers, and Emotional Over-  
467 Involvement was higher in NC mothers than in both Cis-DSI and Trans-DSI mothers. Finally, we performed  
468 intra-class correlations between parent pairs (table 2). We found that fathers and mothers responded differently  
469 in all three groups except for the critical dimension in the Trans-DSI group, where fathers' and mothers'  
470 responses were correlated (ICC=0.67 [95% CI:0.43-0.83]).

### 471 *Are expert raters able to guess whether children have a transgender father when observing family 472 drawings?*

474 In the experimental procedure, we asked four groups of expert raters to guess whether children had a  
475 transgender father when studying family drawings. These experts were child and family psychoanalysts  
476 (FAMPSY), adult psychiatrists (ADUPSY), biologists working in ART (BIOL), and endocrinologists working  
477 with transgender individuals (ENDOC). To assess the possible framing effect [34], we also added a group of  
478 inexperienced raters (students STUD) who received simplified instructions. The results are summarized in figure  
479 1. No group of raters was able to distinguish, based on family drawings, children raised with a transgender father  
480 and conceived through DSI and donor sperm from NC children conceived by heterosexual parents and sexual  
481 intercourse. The details of each rater scoring and the calculation of guessing score by groups of raters are  
482 available in table S5.

483

## 484 **Discussion**

485 To ease discussion of the current results, we propose to explore our 4 hypotheses. Our results validate  
486 our *first hypothesis* namely that psycho-affective development of children born by DSI whose father is a  
487 transgender man do not significantly differ from that of children born by conventional DSI or from that of  
488 children conceived by sexual intercourse of both cisgender parents. We did not show any difference in cognitive  
489 development, gender identity, or mental health problems when comparing the three groups. Moreover, results  
490 regarding attachment and quality of life (descriptive analysis table S1) are overall reassuring. The cognitive  
491 development of all children was good, with an average IQ of 113.9 (ranges: 93-150).

492 In terms of psychopathology, only three children whose father was transgender had a Father's CBCL  
493 Total score in the clinical Z-score range (total score = 64; 65; 68) and one had a score in the limit zone. For all the  
494 children in the Trans-DSI group, including those children, Mother's CBCL Total scores were in the normal  
495 range. The current results contrast with those of White and Ettner's [14] study of children born before their  
496 parents' transition, as they found that 34% of the children had mental health disorders in a study population of 55  
497 children, even if these numbers did not significantly exceed the rates found in the general population. In  
498 Freedman's study, 6% of the children were depressed or expressed suffering [13].

499 Our findings are consistent with not attributing disorders found in previous studies to the fact that these  
500 children have a trans-parent. It is likely that a mixture of risk factors intervened, such as bio-environmental  
501 factors, the child's own experience of his/her parent's transitioning or the social stigma of transitioning in terms  
502 of the children's environment (e.g., school and social media). Regarding bio-environmental factors, it should be  
503 noted that in White and Ettner's study, psychological disorders pre-existed the parent's transition in 63% of the  
504 included children [14].

505 Indeed, our sample differs from previous studies because it is a non-clinical sample composed  
506 exclusively of children from transgender father who had their transition before the children were conceived by  
507 DSI. Fourteen out of 17 families had informed their children (28 out of 32 children) that their father was  
508 assigned female at birth and that they were born by DSI. A family with only one child had informed the child of  
509 its design by DSI but did not reveal the trans identity of the father. Only 3 out of 32 children (2 out of 17  
510 families) had divorced parents. They were maintaining relationships with both parents. The samples from the  
511 previous studies are very different. They consisted mainly of children, one of whose parents was a transgender  
512 woman who had transitioned after the birth of the children [11-14]. They also included important recruitment  
513 bias: sample referred for expert opinion by court in Freedman's study [13] (in addition, this sample was not  
514 compared to a non-clinical sample of children but to a clinical sample of children and adolescents referred for  
515 gender issues); only parental interviews about their children in White and Ettner's study [14]; mainly children  
516 from conflicting/separated parents in Green, Freedman and White. studies [8-14].

517 Quality of life was only assessed in a small number of children due to the young age in our cohort, but  
518 these descriptive results show no negative signal. In addition no child has been bullied or harassed in school or in  
519 social relationships. The risk of harassment and stigmatization for children of transgender parents is a potential  
520 risk [12,35]. Several studies have shown that peer harassment and teasing are infrequent i.e Freedman et al [13]  
521 reported 33% of difficulties with peers in general, but no harassment or victimization; whereas Veldorale-Griffin  
522 [36] found 33% of bullying at school. Qualitative studies found that the children of transgender parents reported

523 feeling protective towards their parent when they noticed discrimination or social rejection of their transgender  
524 parent [37-39]. Also, many transgender parents were developing preventative strategies for themselves and their  
525 children not to be stigmatized [40]. Our results are in lines with previous studies exploring children of  
526 transgender parents. We believe that the low rate of harassment and stigmatization we found is related to the fact  
527 that children in our sample were born after the transition of their parent. It is likely that the absence of disclosure  
528 in the social environment outside the family circle contributed to prevent stigmatization and harassment.

529 We also note that all the children were cisgender identified. The interest in observing children's gender  
530 identity was to answer the question of whether having a transgendered person as a parent had an impact on the  
531 development of the child's gender identity. One assumption could have been that having a transgender parent  
532 leads to a more fluid conception of gender with more possibilities for the child to identify outside the traditional  
533 heteronormative, cisnormative framework [41]. Our results do not support this hypothesis even if we must take  
534 into account the small number of participants in view of the low prevalence of trans-identities in the general  
535 population (approximately 1% according to self-reported surveys [42,43]).

536 Regarding our *second hypothesis* (father and mother reports regarding their child do not differ) was  
537 addressed by comparing mothers and fathers CBCL scores of the same child. We found that fathers globally  
538 responded as mothers for their child in the 3 groups although differences were observed between fathers' and  
539 mothers' responses to certain domains (withdrawn/depressed in the Cis-DSI group and attention problems and  
540 aggressive/behaviour scales in the Trans-DSI group and in the TD group). It seems that neither gender identities,  
541 nor the trans factor nor the mode of conception, and therefore whether there is a genetic link between the father  
542 and the child, have an impact on the parent's view of the possible symptoms of their child.

543 Our *third hypothesis* was that family dynamics from children born by DSI whose father is a transgender  
544 man do not significantly differ from that of families with children born by conventional DSI or from that of  
545 families with children naturally conceived. Attachment could only be assessed in a small number of children due  
546 to the young age of our sample. But the descriptive results show no negative signal in this area (table S1).  
547 Regarding Expressed Emotions investigated with the FMSS, discussion should be cautious. Key aspects for  
548 interpreting Expressed Emotions in families are the need (i) to distinguish fathers and mothers, (ii) to distinguish  
549 the type of condition as it is well known that chronic and severe conditions may impact family functioning [27,  
550 44-46], and (iii) to compare the same condition with the same instruments [47]. In our case, the current study is  
551 the first to explore parenting in the context of DSI. As transgender fathers differed from both the two other  
552 control groups, it seems that not the ART with donor insemination i.e. no genetic link between father and child,  
553 but the trans factor influenced the scores.

554 In contrast with our hypothesis, parental expressed emotion towards the child was not similar across  
555 fathers and across mothers. Indeed, we found that fathers and mothers responded differently in all three groups  
556 except for the critical dimension in the Trans-DSI group, where fathers' and mothers' responses were correlated.  
557 It seems, therefore, that the parent's gender identity has an impact on his/her expressed emotions towards the  
558 child.

559 We believe that the facts that (i) transgender fathers differed from both NC group fathers and Cis-DSI  
560 group fathers in terms of FMSS Expressed Emotions and (ii) transgender fathers were like their child's mothers

561 in terms of criticism might have some meanings for trans-parenting. Indeed, by combining the objective  
562 difference of transgender fathers in the emotional experience with their child and the high intra-class correlation  
563 of critical dimension scores between transgender fathers and their wives (or paired mothers), several hypotheses  
564 can be formulated. (i) For each human being, becoming a parent is a self-flourishing experience transforming  
565 oneself and one's identity [48]. This experience is not the same for a transgender parent and triggers a different  
566 emotional mobilization after one's gender transition. (ii) Transgender parents must manage the projections of a  
567 heteronormative, cisnormative society on their way of making a family. They may cope to their unconventional  
568 situation with anxieties. These projections can also have an impact on the lived experience and emotional  
569 expression of these parents [4].

570 Our *last hypothesis* that was no group of raters would be able to differentiate the family drawings  
571 between children from transgender fathers conceived by DSI and TD children was validated by our results. Here,  
572 the quasi-experimental design based on children's family drawings investigated whether cues not captured by the  
573 questionnaire could be seen by blind raters [17]. Neither the child and family psychoanalysts' group nor the four  
574 other groups of raters were able to differentiate the family drawings of children of trans-fathers from those of  
575 children in the TD group. For many clinicians, the "Drawing of the Family" is considered as a fine and sensitive  
576 means of evaluation of the different aspects of the child's functioning regarding his/her family. This experience  
577 also makes it possible to directly explore the children's productions while our psychopathological assessment  
578 was based on the CBCL where the questionnaires - given the young age of the children - are filled by the  
579 parents. The results show that there is no qualitative difference distinguishable by experts. Since one of our study  
580 limitations is the large age range (see below), we also performed a sensitivity analysis including only children  
581 aged 7 and older (2 groups of 11 children). At this age, all children can draw recognizable characters with  
582 gender-oriented cues [29]. The permutation test found the same results with a sufficient power [30]: no group of  
583 raters were able to guess whose children were sons or girls from transgender fathers (data not shown).

584 In France, few fertility service providers agree to perform DSI for couples whose man is transgender  
585 [15]. The main reason is the concern of professionals that echoes the concern of a part of society about the  
586 welfare of children to come [15]. At the same time, trans-people come to consultation before conceiving a child  
587 and ask practitioners about what science knows about possible risks for their children. We hope that the results  
588 of this study will enable professionals to demystify the issue of trans-parenting and that it will help reduce the  
589 anxiety of transgender people who are already parents or are parents in waiting.

590 Despite some strengths (including a unique sample of children with transgender fathers, two matched  
591 control groups, using standardized instruments, statistical power, and experimental procedures to investigate  
592 qualitative impressions in expressed emotion and family drawing), our study has several limitations. First,  
593 despite being the largest sample of children born from trans-fathers who had their transition before conception,  
594 the sample consisted of a small number of children. Similarly, we recruited a small number of families (only 17  
595 out of 37 families solicited). Several other limitations result directly from the small size of this sample: (i)  
596 because of the small size of the Trans-DSI group, the two control groups constitute convenience samples  
597 recruited according to the characteristics of the Trans-DSI group. (ii) The age ranges and standard deviations are  
598 wide because it has not been possible to select a more homogeneous population of age that would have been at  
599 the same time sufficient for a statistical study. We cannot exclude the possibility of rare differences despite our



600 power calculation. (iii) It should also be noted that we did not reach the theoretical size of the sample required  
601 for a power of 0.8 for the total score of the CBCL. This weakens our results although the theoretical number was  
602 reached for each sub score of the instrument. (iv) Our study group and consequently our matched control groups  
603 showed an over-proportion of boys (75%). This may be viewed as a limitation. Nevertheless, despite matched  
604 comparisons between groups, the CBCL considers the gender of the child in the Z-score statistics that we used.  
605 Also, epidemiological studies show a 15% incidence of mental health in childhood and adolescence, slightly  
606 higher and earlier in boys [49]. This would rather tend to reinforce the validity of our results. Second, the study  
607 is transversal in nature and not prospective. Therefore, many children were young. This did not allow the  
608 evaluation of certain parameters, such as quality of life and self-reported attachment instruments. Third, despite  
609 our efforts to match participants for age, the NC and Trans-DSI groups were not perfectly matched for age to the  
610 Cis-DSI group. Fourth, the response rate was 56% in our study group (17 families out of 30). Further research is  
611 needed, especially with adolescents and young adults, as we cannot exclude that adolescence would eventually  
612 impact children's development.

613 **In conclusion,** we explored cognitive development, mental health, gender identity, and family  
614 dynamics in 32 children who were conceived by donor sperm insemination (DSI) in couples with a cisgender  
615 woman and a transgender man who had his transition before conception. We compared children's psychological  
616 and family outcomes in these children and in two matched control groups. Our study showed that the psycho-  
617 emotional development of children whose fathers are transgender is good and that there is no difference between  
618 these children and those of control groups. Similarly, no rater was able to differentiate the family drawings of  
619 children of trans-fathers from those of children in the NC control group. We also showed that the emotions  
620 expressed by transgender fathers who conceived by DSI were higher than those of cisgender fathers who  
621 conceived by sex or by DSI. The generalization of our results should consider the limitations listed above but  
622 also the context of the sample that show middle/good SES and excellent family stability, two factors that  
623 contribute to children's mental health [50,51]. We believe that this research will also improve transgender  
624 couple care and that of their children in a society where access to care remains difficult in this population [52].

625

626

627

## 628 **Acknowledgements**

629 The authors thank all children and parents who participated in the study.

630

631

632

633

## 634 **References**

- 635 1- Farquhar C, Rishworth JR, Brown J et al. Assisted reproductive technology: an overview of Cochrane  
636 Reviews, *Cochrane Database Syst Rev.* 2015; **7** doi:10.1002/14651858.CD010537.
- 637 2- De Roo C, Tilleman K, T'Sjoen G & De Sutter P. Fertility options in transgender people. *International*  
638 *Review of Psychiatry.* 2016; **28**(1) :112-119.
- 639 3- World Professional Association for Transgender Health (WPATH) Standards of Care, 7<sup>th</sup> version. 2012;  
640 [www.wpath.org](http://www.wpath.org).
- 641 4- Condat A, Mendes N, Drouineaud V, Gründler N, Lagrange C, Chiland C, Wolf JP, Ansermet F, Cohen D.  
642 Biotechnologies that empower transgender persons to self-actualize as individuals, partners, spouses, and parents  
643 are defining new ways to conceive a child: psychological considerations and ethical issues. *Philos Ethics*  
644 *Humanit Med.* 2018 ; **13**(1) :1. doi: 10.1186/s13010-018-0054-3.
- 645 5- Haute Autorité de Santé. Situation actuelle et perspectives d'évolution de la prise en charge médicale du  
646 transsexualisme en France. 2009 ; [https://www.has-sante.fr/upload/docs/application/pdf/2009-](https://www.has-sante.fr/upload/docs/application/pdf/2009-12/rapport_transsexualisme.pdf)  
647 [12/rapport\\_transsexualisme.pdf](https://www.has-sante.fr/upload/docs/application/pdf/2009-12/rapport_transsexualisme.pdf).
- 648 6- Giami A. Procréation et parentalité dans la population Trans' : Genre, parcours biographique, parcours de  
649 transition. In Hérault L. (Ed.), *La parenté transgenre*. Presses Universitaires de Provence, in French. 2014.
- 650 7- Giami A, Beaubatie E. Gender Identification and Sex Reassignment Surgery in the Trans Population: A  
651 Survey Study in France, *Arch Sex Behav.* 2014; doi: 10.1007/s10508-014-0382-3.
- 652 8- Ansermet F. *The art of making children: the new world of assisted reproductive technology*. New York,  
653 Routledge Press. 2017.
- 654 9- Lecourt D. *Humain, posthumain*. Paris, Presse Universitaire de France. 2003.
- 655 10- De Wert G, Dondorp W, Shenfield F, Barri P, Devroey P, Diedrich K, Tarlatzis B, Provoost V, Pennings G.  
656 ESHRE Task Force on Ethics and Law 23: medically assisted reproduction in singles, lesbian an gay couples,  
657 and transsexual people. *Human Reproduction.* 2014; **29**(9): 1859-1865. doi: 10.1093/humarep/deu183.
- 658 11- Green R. Sexual identity of 37 children raised by homosexual or transsexual parents. *Am. J. Psychiatry.*  
659 1978; **135** :692–697.
- 660 12- Green R. Transsexual's Children. *Int. J. Transgenderism.* 1998; **2**.
- 661 13- Freedman D, Tasker F & di Ceglie D. Children and Adolescents with Transsexual Parents Referred to a  
662 Specialist Gender Identity Development Service: A Brief Report of Key Developmental Features. *Clin. Child*  
663 *Psychol. Psychiatry.* 2002; **7** :423–432.
- 664 14- White T & Ettner R. Adaptation and adjustment in children of transsexual parents. *Eur. Child Adolesc.*  
665 *Psychiatry.*2007; **16** :215–221.
- 666 15- Chiland C, Clouet AM, Golse B, Guinot M & Wolf JP. A new type of family: Transmen as fathers thanks to  
667 donor sperm insemination. A 12-year follow-up exploratory study of their children. *Neuropsychiatr. Enfance*  
668 *Adolesc.* 2013; **61** :365–370.
- 669 16- Flavigny C, Montfort E, Delsol C. PMA pour toutes : derrière le problème éthique, la dérive culturelle.  
670 Institut Thomas More. 2018; [http://institut-thomas-more.org/2017/06/23/pma-pour-toutes-derriere-le-probleme-](http://institut-thomas-more.org/2017/06/23/pma-pour-toutes-derriere-le-probleme-ethique-la-derive-culturelle)  
671 [ethique-la-derive-culturelle](http://institut-thomas-more.org/2017/06/23/pma-pour-toutes-derriere-le-probleme-ethique-la-derive-culturelle)
- 672 17- Mamou G, Lagrange Ch, Mendes N, Wielart J, Poirier F, Medjkane F, Brunelle J, Drouineaud V, Rosenblum  
673 O, Gründler N, Ansermet F, Falissard B, Cohen D, Condat A. The developmental implications of the use of new

- 674 reproductive technologies for transgender people: a comparative cross-sectional study. *Front Psychiatry*. 2020;  
675 11: 243. Published online 2020 Apr 1. doi: 10.3389/fpsy.2020.00243
- 676 18- Magaña AB, Goldstein MJ, Karno et al. A brief method for assessing expressed emotion in relatives of  
677 psychiatric patients. *Psychiatry Research*. 1986; **17** :203–212. doi: 10.1016/0165-1781(81)90049-1.
- 678 19- Brunet L, Kunstmann JL. Gamete donation in France: the future of the anonymity doctrine. *Med Health Care*  
679 *Philos*. 2013 ; **16**(1) :69-81. doi: 10.1007/s 11019-012-9431-7.
- 680 20- Josse D. Le manuel BLR-C, Brunet-Lézine Révisé : Echelle de développement psychomoteur de la première  
681 enfance. Paris: EAP. 1997.
- 682 21- Wechsler D. Wechsler Preschool and Primary Intelligence Scale for Children. Third Edition. Pearson, San  
683 Antonio, TX. 2002.
- 684 22- Wechsler D. Wechsler Intelligence Scale for Children. Fourth Edition. Pearson, San Antonio, TX. 2003.
- 685 23- Achenbach TM, Rescorla LA. Manual for the ASEBA School-Age Forms & Profiles. Burlington, University  
686 of Vermont, Research Center for Children, Youth, & Families. 2001; 16-17.
- 687 24- Zucker KJ, Bradley SJ, Sullivan CB et al. A gender identity interview for children, *J Pers Assess*. 1993;  
688 **61**(3) :443-56. doi: 10.1207/s15327752jpa6103\_2.
- 689 25- Ravens-Sieberer U, Gosch A, Rajmil L et al. KIDSCREEN-52 quality-of-life measure for children and  
690 adolescents. *Expert Rev Pharmacoecon Outcomes Res*. 2005; **5**(3) :353-64. doi: 10.1586/14737167.5.3.353.
- 691 26- Armsden GC, Greenberg MT. The inventory of parent and peer attachment: Individual differences and their  
692 relationship to psychological well-being in adolescence. *J Youth Adolesc*. 1987; **16**(5) :427-54. doi:  
693 10.1007/BF02202939.
- 694 27- Duclos J, Dorard G, Cook-Darzens S, Curt F, Faucher S, Berthoz S, Falissard B and Godart N. Predictive  
695 factors for outcome in adolescents with anorexia nervosa: To what extent does parental Expressed Emotion play  
696 a role? *PLoS ONE*. 2018; July 31, <https://doi.org/10.1371/journal.pone.0196820>.
- 697 28- Cohen D, Milman D, Venturyera V et al. Psychodynamic Experience Enhances Recognition of Hidden  
698 Childhood Trauma. *PLoS ONE*. 2011; **6**(4) :e18470. doi:10.1371/journal.pone.0018470.
- 699 29- Corman L. The Family Drawing Test in Medical-Pedagogical Practice. P.U.F, Paris. 1964.
- 700 30- Falissard B, Milman D, Cohen D. A generalization of the «lady-tasting-tea» procedure to link qualitative and  
701 quantitative approaches in psychiatric research. *International Journal of Statistics in Medical Research*. 2013; **2**  
702 :88-9327.
- 703 31- Achenbach TM & Rescorla LA. Multicultural Supplement to the Manual for the ASEBA School-Age Forms  
704 & Profiles. 2007; 91-92.
- 705 32- R Development Core Team. R. A language and environment for statistical computing. 2001; from  
706 <http://www.R-project.org>.
- 707 33- Fisher RA. The design of experiments. London: Oliver and Boyd. 1935.
- 708 34- Tversky A, Kahneman D. The framing of decisions and the psychology of choice. *Science*. 1981; **211**: 453–  
709 458.
- 710 35- Stotzer RL, Herman JL, Hasenbush A. Transgender parenting: A review of existing research. The Williams  
711 Institute, UCLA School of Law; 2014; October

- 712 36- Verdorale-Griffin A. Transgender parents and their adult children's experiences of disclosure and transition.  
713 Journal of GLBT Family Studies. 2014; **10**(5):475-501, doi: [10.1080/1550428X.2013.866063](https://doi.org/10.1080/1550428X.2013.866063).
- 714 37- Hines S. Intimate transition: Transgender practices of partnering and parenting. *Sociology*. 2006; **40**: 353-  
715 371.
- 716 38- Hines S. *TransForming Gender: Transgender Practices of Identity, Intimacy, and Care*. Policy Press: Bristol,  
717 England. 2007.
- 718 39- Pyne J. *Transforming Family: Trans Parents and their Struggles, Strategies, and Strengths*. Toronto: LGBTQ  
719 Parenting Network. Shebourne Health Clinic. 2012; <http://www.lgbtqparentingconnection.ca/socialchange/Tr>
- 720 40- Haines BA, Ajayi AA, Boyd H. Making trans parents visible: Intersectionality of trans and parenting  
721 identities. *Feminism and Psychology*. 2014; **24**, 238-237.
- 722 41- McGuire JK, Kuvalanka KA, Catalpa JM, Toomey RB. Transfamily Theory : How the Presence of Trans\*  
723 Family Members Informs Gender Development in Families. *Journal of Family Theory & Review*. 2016; **8** :60-  
724 73. DOI :10.1111/jftr.12125.
- 725 42- Clark TC, Lucassen MF, Bullen P, Denny SJ, Fleming TM, Robinson EM, Rossen FV. The health and well-  
726 being of transgender high school students: results from the New Zealand adolescent health survey (Youth'12). *J*  
727 *Adolesc Health*. 2014; **55**(1) :93-9. doi: 10.1016/j.jadohealth.2013.11.008.Epub 2014 Jan 14.
- 728 43- Shields JP, Cohen R, Glassman JR, Whitaker K, Franks H, Bertolini I. Estimating population size and  
729 demographic characteristics of lesbian, gay, bisexual, and transgender youth in middle school, *J Adolesc Health*.  
730 2013; **52**(2) :248-50. Doi:10.1016/j.jadohealth.2012.06.016. Epub 2012 Aug 15.
- 731 44- Duclos J, Vibert S, Mattar L, Maria AS, Godart N. Expressed emotion in families with patients with eating  
732 disorders: a review of the literature. *Curr Psychiatry Rev*. 2012; **8**(3) :183-202.  
733 <https://doi.org/10.2174/157340012800792975>
- 734 45- Zhang Y. Family functioning in the context of an adult family member with illness: A concept analysis. *J*  
735 *Clin Nurs*. 2018; **27**(15-16) :3205-3224. doi: 10.1111/jocn.14500.
- 736 46- Leeman J, Crandell JL, Lee A, Bai J, Sandelowski M, Knafl K. Family Functioning and the Well-Being of  
737 Children With Chronic Conditions: A Meta-Analysis. *Res Nurs Health*. 2016; **39**(4) :229-43. doi:  
738 10.1002/nur.21725. Epub 2016 Apr 29.
- 739 47- Khafi TY, Yates TM, Sher-Censor E. The Meaning of Emotional Overinvolvement in Early Development :  
740 Prospective Relations with Child Behavior Problems. *J Fam Psychol*. 2015; **29**(4) :585-594. doi :  
741 10.1037/fam0000111
- 742 48- Abraham E, Feldman R. The neurobiology of human allomaternal care; implications for fathering,  
743 coparenting, and children's social development. *Physiol Behav*. 2018; **193**(Pt A):25-34.
- 744 49- Dalsgaard S, Thorsteinsson E, Trabjerg BB, Schullehner J, Plana-Ripoll O, Brikell I, Wimberley T,  
745 Thygesen M, Madsen KB, Timmerman A, Schendel D, McGrath JJ, Mortensen PB, Pedersen CB. Incidence  
746 Rates and Cumulative Incidences of the Full Spectrum of Diagnosed Mental Disorders in Childhood and  
747 Adolescence. *JAMA Psychiatry*. 2019; doi: 10.1001/jamapsychiatry.2019.3523.
- 748 50- Reiss F. Socioeconomic inequalities and mental health problems in children and adolescents: a systematic  
749 review. *Soc Sci Med*. 2013; **90** :24-31. doi: 10.1016/j.socscimed. Epub 2013 May 4.
- 750 51- Wadman R., Hiller R., St Clair M. The influence of early familial adversity on adolescent risk behaviors and  
751 mental health: Stability and transition in family adversity profiles in a cohort samples. *Dev Psychopathol*. 2019;  
752 **7** :1-18. doi: 10.1017/S0954579419000191.

753 52- James-Abra S, Tarasoff L.A, Green D, Epstein R, Anderson S, Marvel S, Steele LS, Ross LE. Trans people's  
754 experiences with assisted reproductive services: a qualitative study. Hum Reprod. 2015; **30**(6): 1365-1374.

755

756

757

758 **Figure Caption**

759 **Figure 1. The recognition scores of each rating group during the experimental procedure with**  
760 **the family drawings.** The scores calculated by adult psychiatrists, endocrinologists, biologists, family  
761 therapists and students when determining whether family drawings were done by children who had a transgender  
762 father and were born by DSI or by children who had a cisgender father and were born by sexual intercourse. For  
763 each group of raters, the score could vary from +368 for all perfect guesses to -368 for a complete failure, and  
764 the probability that the score differed from chance was calculated using a permutation test. The computed p-  
765 value for each group of raters is indicated on the bar (level of significance  $p=0.01$ ).

766

767

768

| <b>Table 1. Demographics and clinical characteristics of the participants</b>                               |                          |                               |                                 |                |                   |
|-------------------------------------------------------------------------------------------------------------|--------------------------|-------------------------------|---------------------------------|----------------|-------------------|
|                                                                                                             | <b>NC Group<br/>N=28</b> | <b>Cis-DSI Group<br/>N=28</b> | <b>Trans-DSI Group<br/>N=32</b> | <b>Test</b>    | <b>p (test)</b>   |
| <b>Gender</b>                                                                                               |                          |                               |                                 |                |                   |
| Male                                                                                                        | 21 (75%)                 | 16 (57%)                      | 25 (78%)                        | Chi2           | p=0.096           |
| Female                                                                                                      | 7 (25%)                  | 12 (43%)                      | 7 (22%)                         |                |                   |
| <b>Socio-economics</b>                                                                                      |                          |                               |                                 |                |                   |
| Low                                                                                                         | 1 (3%)                   | 0 (0%)                        | 1 (3%)                          | Fisher         | <b>p&lt;0.001</b> |
| Intermediate                                                                                                | 2 (7%)                   | 20 (71%)                      | 16 (50%)                        |                |                   |
| Good                                                                                                        | 25 (89%)                 | 8 (29%)                       | 15 (47%)                        |                |                   |
| <b>Parental status</b>                                                                                      |                          |                               |                                 |                |                   |
| In couple                                                                                                   | 28 (100%)                | 24 (86%)                      | 29 (91%)                        | Fisher         | <b>p=0.038</b>    |
| Separated                                                                                                   | 0 (0%)                   | 4 (14%)                       | 3 (9%)                          |                |                   |
| <b>Age in years</b>                                                                                         |                          |                               |                                 |                |                   |
| mean (SD) [min;max]                                                                                         | 7.63 (3.71) [1.3;14.2]   | 4.31 (2.61) [0.7;11]          | 6.25 (3.59) [1.6;13.9]          | ANOVA          | <b>p=0.002</b>    |
| <b>Total Intellectual Quotient (N<sub>NC</sub>=26, N<sub>CDSI</sub>=28, N<sub>TDSI</sub>=32)</b>            |                          |                               |                                 |                |                   |
| mean (SD) [min;max]                                                                                         | 118.7 (14.82) [97;153]   | 111.2 (19.69) [81;151]        | 113.9 (16.33) [93;150]          | Kruskal-Wallis | p=0.182           |
| <b>Gender Identity Interview for Children (N<sub>NC</sub>=24, N<sub>CDSI</sub>=19, N<sub>TDSI</sub>=25)</b> |                          |                               |                                 |                |                   |
| <b>Total score [pr= 0;24]</b>                                                                               |                          |                               |                                 |                |                   |
| mean (SD) [min;max]                                                                                         | 1 (2.12) [0;10]          | 1.16 (1.86) [0;6]             | 1.24 (1.45) [0;5]               | Kruskal-Wallis | p=0.45            |
| <b>Affective gender confusion [pr= 0;14]</b>                                                                |                          |                               |                                 |                |                   |
| mean (SD) [min;max]                                                                                         | 0.96 (1.99) [0;9]        | 0.89 (1.45) [0;5]             | 0.84 (1.14) [0;4]               | Kruskal-Wallis | p=0.87            |
| <b>Cognitive gender confusion [pr= 0;8]</b>                                                                 |                          |                               |                                 |                |                   |
| mean (SD) [min;max]                                                                                         | 0.08 (0.28) [0;1]        | 0.21 (0.63) [0;2]             | 0.16 (0.8) [0;4]                | Kruskal-Wallis | p=0.72            |
| <b>Father CBCL T-Score (N<sub>NC</sub>=27, N<sub>CDSI</sub>=26, N<sub>TDSI</sub>=30)</b>                    |                          |                               |                                 |                |                   |
| <b>Anxious/depressed</b>                                                                                    |                          |                               |                                 |                |                   |
| mean (SD) [min;max]                                                                                         | 52.19 (4.95) [50;70]     | 51.31 (3.72) [50;68]          | 53.33 (5.26) [50;66]            | Kruskal-Wallis | p=0.11            |
| <b>Somatic complaints</b>                                                                                   |                          |                               |                                 |                |                   |
| mean (SD) [min;max]                                                                                         | 52.56 (4.07) [50;62]     | 51.42 (3.70) [50;62]          | 53.8 (5.90) [50;72]             | Kruskal-Wallis | <b>p=0.043</b>    |
| <b>Withdrawn/depressed</b>                                                                                  |                          |                               |                                 |                |                   |
| mean (SD) [min;max]                                                                                         | 52.81 (4.03) [50;66]     | 51.65 (3.20) [50;63]          | 54.4 (6.01) [50;70]             | Kruskal-Wallis | p=0.28            |
| <b>Attention problems</b>                                                                                   |                          |                               |                                 |                |                   |
| mean (SD) [min;max]                                                                                         | 52.04 (3.71) [50;66]     | 52.35 (4.15) [50;64]          | 52.43 (3.69) [50;62]            | Kruskal-Wallis | p=0.73            |
| <b>Agressive behavior</b>                                                                                   |                          |                               |                                 |                |                   |
| mean (SD) [min;max]                                                                                         | 51.85 (3.96) [50;63]     | 52.12 (4.58) [50;69]          | 52.5 (3.95) [50;63]             | Kruskal-Wallis | p=0.34            |
| <b>Internalizing</b>                                                                                        |                          |                               |                                 |                |                   |
| mean (SD) [min;max]                                                                                         | 45 (10.2) [29;65]        | 41.65 (9.23) [29;63]          | 47.87 (12.56) [29;69]           | ANOVA          | p=0.11            |

|                                                                                  |                       |                       |                       |                |        |  |
|----------------------------------------------------------------------------------|-----------------------|-----------------------|-----------------------|----------------|--------|--|
| <b>Externalizing</b>                                                             |                       |                       |                       |                |        |  |
| mean (SD) [min;max]                                                              | 43.85 (9.82) [28;64]  | 44.73 (10.88) [32;72] | 45.70 (10.05) [28;61] | ANOVA          | p=0.79 |  |
| <b>Total problems</b>                                                            |                       |                       |                       |                |        |  |
| mean (SD) [min;max]                                                              | 43.59 (10.31) [28;65] | 41.31 (9.98) [24;67]  | 46.07 (11.29) [26;68] | ANOVA          | p=0.25 |  |
| <b>Mother CBCL (N<sub>NC</sub>=27, N<sub>CDSI</sub>=26, N<sub>TDSI</sub>=31)</b> |                       |                       |                       |                |        |  |
| <b>Anxious/depressed</b>                                                         |                       |                       |                       |                |        |  |
| mean (SD) [min;max]                                                              | 52.89 (5.99) [50;74]  | 52.23 (4.63) [50;68]  | 52.06 (4.13) [50;64]  | Kruskal-Wallis | p=0.96 |  |
| <b>Somatic complaints</b>                                                        |                       |                       |                       |                |        |  |
| mean (SD) [min;max]                                                              | 52.3 (4.08) [50;64]   | 51.77 (3.46) [50;64]  | 53 (5.17) [50;70]     | Kruskal-Wallis | p=0.77 |  |
| <b>Withdrawn</b>                                                                 |                       |                       |                       |                |        |  |
| mean (SD) [min;max]                                                              | 52.74 (4.46) [50;70]  | 52.69 (3.94) [50;63]  | 53.71 (4.70) [50;68]  | Kruskal-Wallis | p=0.45 |  |
| <b>Attention problems</b>                                                        |                       |                       |                       |                |        |  |
| mean (SD) [min;max]                                                              | 51.41 (3.04) [50;62]  | 52.42 (4.69) [50;67]  | 52.39 (3.77) [50;62]  | Kruskal-Wallis | p=0.68 |  |
| <b>Agressive behavior</b>                                                        |                       |                       |                       |                |        |  |
| mean (SD) [min;max]                                                              | 50.74 (2.01) [50;59]  | 52.65 (4.92) [50;69]  | 52.39 (3.49) [50;60]  | Kruskal-Wallis | p=0.06 |  |
| <b>Internalizing</b>                                                             |                       |                       |                       |                |        |  |
| mean (SD) [min;max]                                                              | 54.04 (10.43) [29;63] | 44.15 (10.01) [29;63] | 47.48 (9.47) [29;66]  | ANOVA          | p=0.42 |  |
| <b>Externalizing</b>                                                             |                       |                       |                       |                |        |  |
| mean (SD) [min;max]                                                              | 43.41 (8.38) [28;58]  | 47.31 (12.24) [28;72] | 45.68 (9.75) [28;61]  | ANOVA          | p=0.38 |  |
| <b>Total_problems</b>                                                            |                       |                       |                       |                |        |  |
| mean (SD) [min;max]                                                              | 43.04 (8.14) [28;63]  | 43.58 (11.23) [24;67] | 44.94 (9.5) [26;64]   | ANOVA          | p=0.74 |  |

NC: Naturally Conceived; Cis-DSI: Conventional Donor Semen Insemination; Trans-DSI: Transgender father and Donor Semen Insemination; CBCL: Child Behavior Check List; GIIC: Gender Identity Interview for Children; N: Number of participants who completed the measure; pr: possible range.

769

770

771

| <b>Table 2. CBCL (Child Behavior Check List) and FMSS (Five Minutes Speech Sample): correlation between father's and mother's scores</b> |                          |                               |                                 |
|------------------------------------------------------------------------------------------------------------------------------------------|--------------------------|-------------------------------|---------------------------------|
|                                                                                                                                          | <b>NC Group<br/>N=28</b> | <b>Cis-DSI Group<br/>N=28</b> | <b>Trans-DSI Group<br/>N=32</b> |
| <b>CBCL T-score by Pairs (N<sub>NC</sub>=27, N<sub>CDSI</sub>=26, N<sub>TDSI</sub>=29)</b>                                               |                          |                               |                                 |
| <b>Anxious/depressed T-Score</b>                                                                                                         |                          |                               |                                 |
| ICC [lower bound;upper bound]                                                                                                            | 0.39 [0.06;0.65]         | 0.68 [0.44;0.83]              | 0.63 [0.38;0.80]                |
| <b>Somatic complaints T-Score</b>                                                                                                        |                          |                               |                                 |
| ICC [lower bound;upper bound]                                                                                                            | 0.47 [0.15;0.70]         | 0.80 [0.63;0.90]              | 0.60 [0.32;0.78]                |
| <b>Withdrawn depressed T-Score</b>                                                                                                       |                          |                               |                                 |
| ICC [lower bound;upper bound]                                                                                                            | 0.79 [0.61;0.89]         | 0.15 [-0.20;0.47]             | 0.41 [0.08;0.66]                |
| <b>Attention problems T-score</b>                                                                                                        |                          |                               |                                 |
| ICC [lower bound;upper bound]                                                                                                            | 0.23 [-0.12;0.53]        | 0.80 [0.62;0.89]              | 0.01 [-0.33;0.36]               |
| <b>Agressive behavior T-score</b>                                                                                                        |                          |                               |                                 |
| ICC [lower bound;upper bound]                                                                                                            | 0.09 [-0.24;0.42]        | 0.74 [0.54;0.87]              | 0.20 [-0.15;0.51]               |
| <b>Internalizing T-score</b>                                                                                                             |                          |                               |                                 |
| ICC [lower bound;upper bound]                                                                                                            | 0.70 [0.48;0.84]         | 0.66 [0.42;0.82]              | 0.65 [0.40;0.81]                |
| <b>Externalizing T-score</b>                                                                                                             |                          |                               |                                 |
| ICC [lower bound;upper bound]                                                                                                            | 0.66 [0.41;0.82]         | 0.81 [0.63;0.90]              | 0.67 [0.43;0.82]                |
| <b>Total problems T-score</b>                                                                                                            |                          |                               |                                 |
| ICC [lower bound;upper bound]                                                                                                            | 0.66 [0.40;0.81]         | 0.79 [0.60;0.89]              | 0.64 [0.39;0.81]                |
| <b>FMSS score by Pairs (N<sub>NC</sub>=19, N<sub>CDSI</sub>=25, N<sub>TDSI</sub>=30)</b>                                                 |                          |                               |                                 |
| <b>Expressed Emotion</b>                                                                                                                 |                          |                               |                                 |
| ICC [lower bound;upper bound]                                                                                                            | 0.10 [-0.14;0.38]        | 0.00 [-0.34;0.34]             | 0.00 [-0.34;0.34]               |
| <b>Criticism</b>                                                                                                                         |                          |                               |                                 |
| ICC [lower bound;upper bound]                                                                                                            | 0.20 [-0.15;0.51]        | 0.16 [-0.19;0.48]             | 0.67 [0.43;0.83]                |
| <b>Emotional Over Involvement</b>                                                                                                        |                          |                               |                                 |
| ICC [lower bound;upper bound]                                                                                                            | 0.18 [-0.09;0.46]        | 0.02 [-0.33;0.36]             | 0.00 [-0.34;0.34]               |

NC: Naturally Conceived; Cis-DSI: Conventional Donor Semen Insemination; Trans-DSI: Transgender father and Donor Semen Insemination; ICC: Intraclass correlation; N: Number of participants who completed the measure.

772

773

774

775

776

777

778



779

| <b>Table 3 - Five Minute Speech Sample Results</b>                                                                                                                                               |                          |                               |                                 |             |                   |
|--------------------------------------------------------------------------------------------------------------------------------------------------------------------------------------------------|--------------------------|-------------------------------|---------------------------------|-------------|-------------------|
|                                                                                                                                                                                                  | <b>NC Group<br/>N=28</b> | <b>Cis-DSI Group<br/>N=28</b> | <b>Trans-DSI Group<br/>N=32</b> | <b>Test</b> | <b>p (test)</b>   |
| <b>Mother Expressed Emotion (N<sub>NC</sub>=21, N<sub>CDSI</sub>=28, N<sub>TDSI</sub>=30)</b>                                                                                                    |                          |                               |                                 |             |                   |
| Low                                                                                                                                                                                              | 1 (5%)                   | 9 (32%)                       | 3 (10%)                         | Chi2        | <b>p=0.005</b>    |
| Limit                                                                                                                                                                                            | 13 (62%)                 | 13 (46%)                      | 15 (50%)                        |             |                   |
| High                                                                                                                                                                                             | 7 (33%)                  | 6 (21%)                       | 12 (40%)                        |             |                   |
| <b>Mother Criticism (N<sub>NC</sub>=21, N<sub>CDSI</sub>=28, N<sub>TDSI</sub>=30)</b>                                                                                                            |                          |                               |                                 |             |                   |
| Low                                                                                                                                                                                              | 17 (81%)                 | 23 (82%)                      | 16 (53%)                        | Chi2        | <b>p=0.007</b>    |
| Limit                                                                                                                                                                                            | 3(14%)                   | 4 (14%)                       | 9 (30%)                         |             |                   |
| High                                                                                                                                                                                             | 1 (5%)                   | 1 (4%)                        | 5 (17%)                         |             |                   |
| <b>Mother Emotional Over Involvement (N<sub>NC</sub>=21, N<sub>CDSI</sub>=28, N<sub>TDSI</sub>=30)</b>                                                                                           |                          |                               |                                 |             |                   |
| Low                                                                                                                                                                                              | 1 (5%)                   | 10 (36%)                      | 5 (17%)                         | Chi2        | <b>p=0.010</b>    |
| Limit                                                                                                                                                                                            | 14 (67%)                 | 13 (46%)                      | 17 (57%)                        |             |                   |
| High                                                                                                                                                                                             | 6 (29%)                  | 5 (18%)                       | 8 (27%)                         |             |                   |
| <b>Father Expressed Emotion (N<sub>NC</sub>=19, N<sub>CDSI</sub>=25, N<sub>TDSI</sub>=31)</b>                                                                                                    |                          |                               |                                 |             |                   |
| Low                                                                                                                                                                                              | 7 (37%)                  | 8 (32%)                       | 2 (6%)                          | Chi2        | <b>p&lt;0.001</b> |
| Limit                                                                                                                                                                                            | 10 (53%)                 | 15 (60%)                      | 17 (55%)                        |             |                   |
| High                                                                                                                                                                                             | 2 (10%)                  | 2 (8%)                        | 12 (39%)                        |             |                   |
| <b>Father criticism (N<sub>NC</sub>=19, N<sub>CDSI</sub>=25, N<sub>TDSI</sub>=31)</b>                                                                                                            |                          |                               |                                 |             |                   |
| Low                                                                                                                                                                                              | 13 (68%)                 | 20 (80%)                      | 15 (48%)                        | Chi2        | <b>p=0.002</b>    |
| Limit                                                                                                                                                                                            | 5 (26%)                  | 5 (20%)                       | 13 (42%)                        |             |                   |
| High                                                                                                                                                                                             | 1 (5%)                   | 0 (0%)                        | 3 (10%)                         |             |                   |
| <b>Father Emotional Over Involvement (N<sub>NC</sub>=19, N<sub>CDSI</sub>=25, N<sub>TDSI</sub>=31)</b>                                                                                           |                          |                               |                                 |             |                   |
| Low                                                                                                                                                                                              | 9 (47%)                  | 9 (36%)                       | 5 (16%)                         | Chi2        | <b>p&lt;0.001</b> |
| Limit                                                                                                                                                                                            | 9 (47%)                  | 14 (56%)                      | 17 (55%)                        |             |                   |
| High                                                                                                                                                                                             | 1 (5%)                   | 2 (8%)                        | 9 (29%)                         |             |                   |
| <i>NC: Naturally Conceived; Cis-DSI: Conventional Donor Semen Insemination; Trans-DSI: Transgender father and Donor Semen Insemination; N: Number of participants who completed the measure.</i> |                          |                               |                                 |             |                   |

780

781

782

783

784

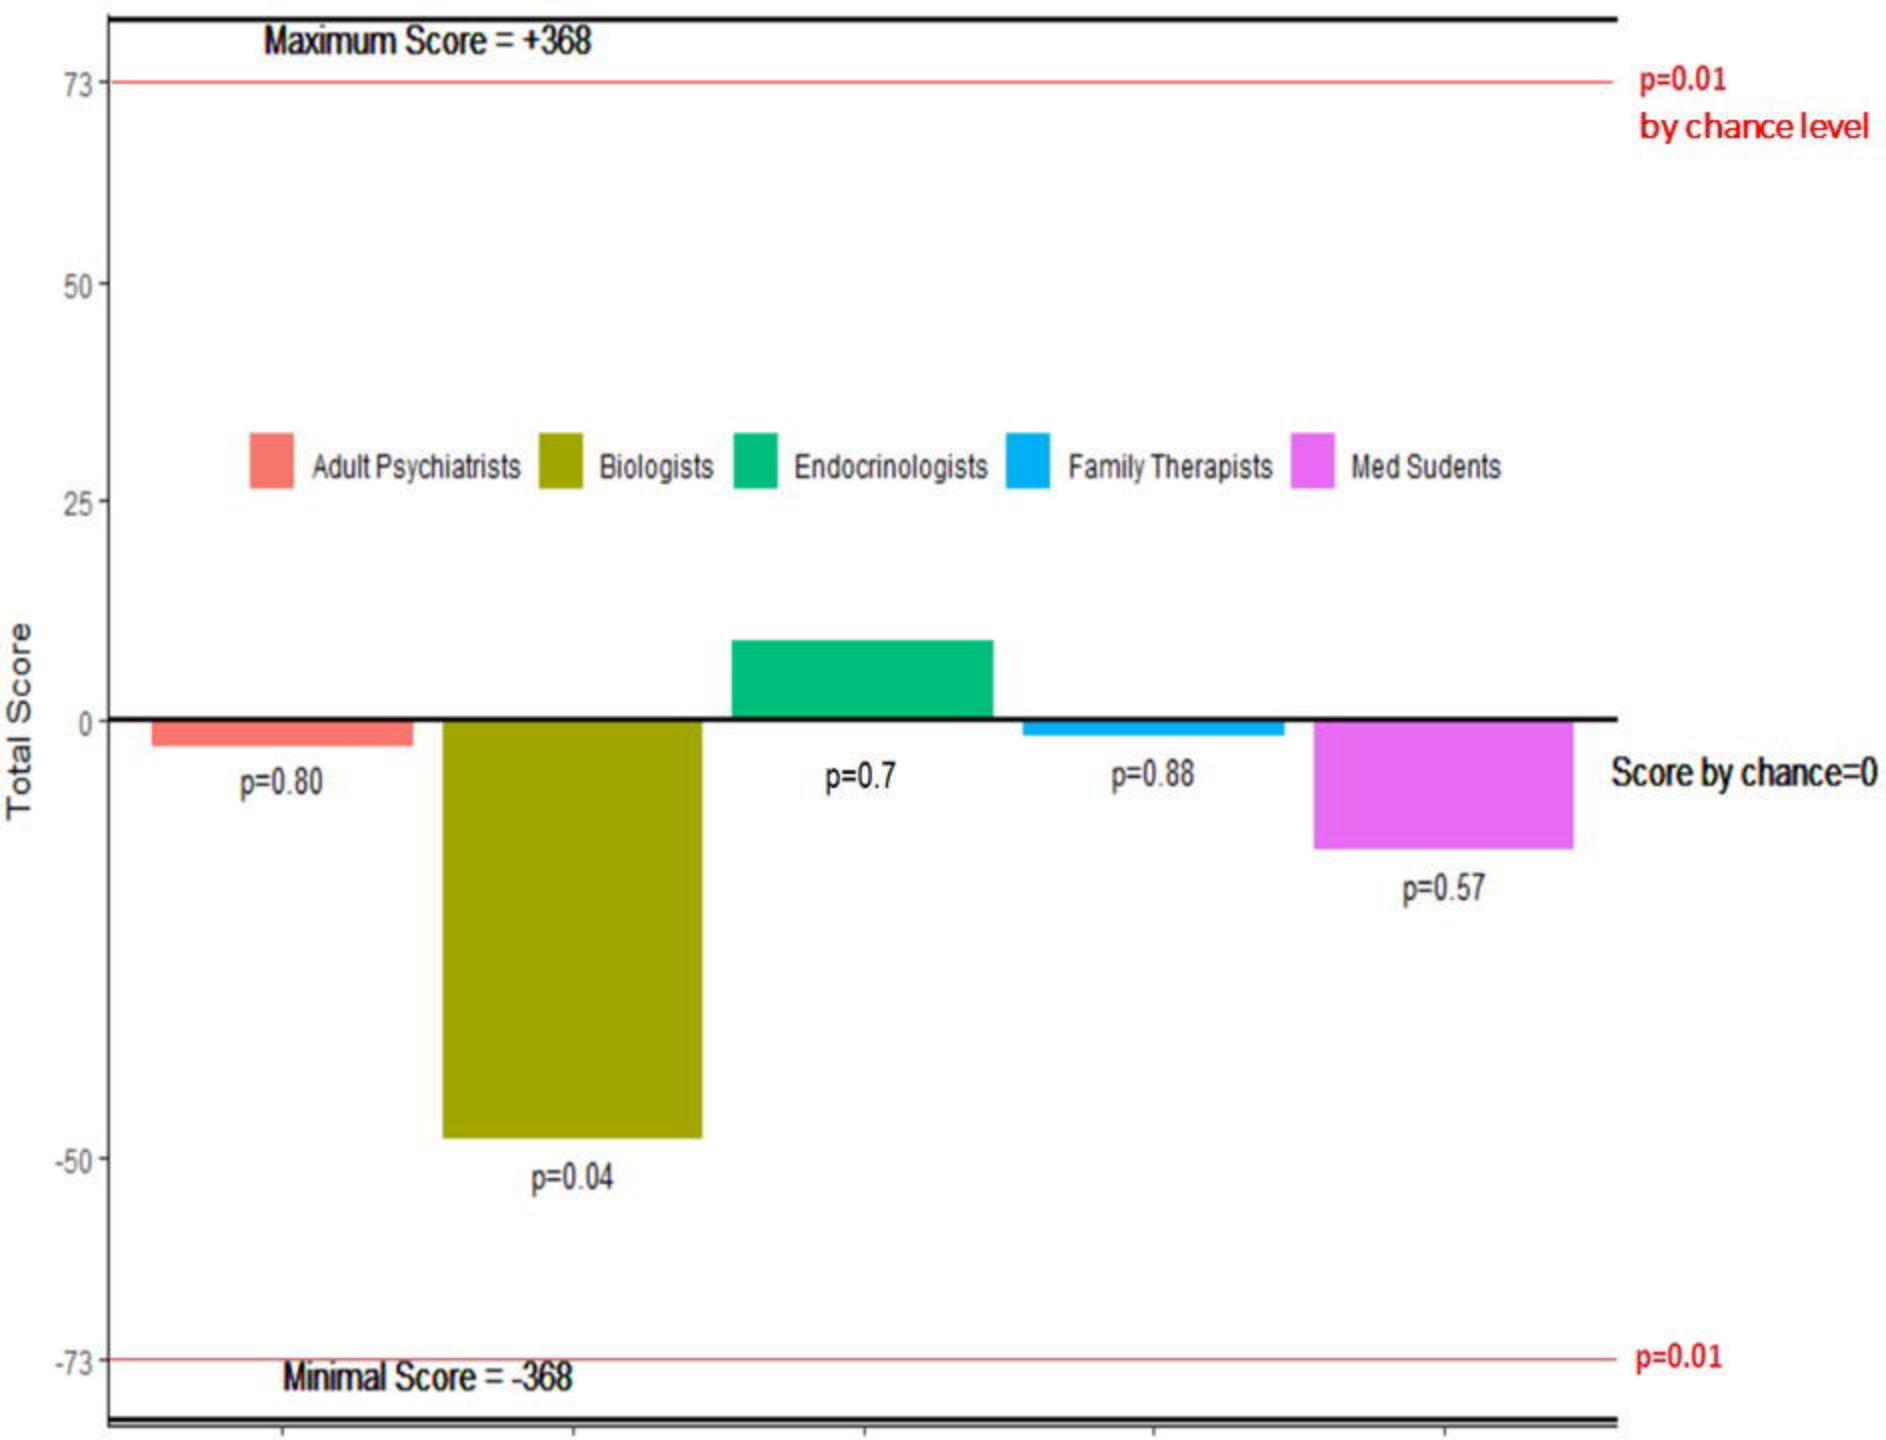

Source: https://medrxiv.org/content/10.1101/2020.06.25.20140020v1.full.pdf
